# Supplementary material for: Realizing an excellent conversion efficiency of 14.5% in the Mg3Sb2/GeTe-based thermoelectric module for waste heat recovery
Source: Royal Society of Chemistry journal article supplement (doi:10.1039/d3ee02587j), 2023-01-01
Supplement: d3ee02587j1.pdf [file d3ee02587j1.pdf]

## Supplementary Materials for

### **Realizing excellent conversion efficiency of 14.5% in Mg<sub>3</sub>Sb<sub>2</sub>/GeTe-based thermoelectric module for waste heat recovery**

Xiaofang Li<sup>a†</sup>, Chen Chen<sup>b†\*</sup>, Li Yin<sup>c†</sup>, Xinyu Wang<sup>d</sup>, Jun Mao<sup>c, e</sup>, Feng Cao<sup>a\*</sup>, and Qian Zhang<sup>c, e\*</sup>

<sup>a</sup>*School of Science, Harbin Institute of Technology, Shenzhen 518055, China*

<sup>b</sup>*School of Physical Sciences, Great Bay University, Dongguan 523000, China*

<sup>c</sup>*School of Materials Science and Engineering, and Institute of Materials Genome & Big Data, Harbin Institute of Technology, Shenzhen 518055, China*

<sup>d</sup>*Institute for Advanced Materials, Hubei Normal University, Huangshi 435002, China*

<sup>e</sup>*State Key Laboratory of Advanced Welding and Joining, Harbin Institute of Technology, Harbin 150001, China*

†These authors contributed equally to this work.

\*Corresponding author. Email: [ccmldn@gbu.edu.cn](mailto:ccmldn@gbu.edu.cn); [caofeng@hit.edu.cn](mailto:caofeng@hit.edu.cn); [zhangqf@hit.edu.cn](mailto:zhangqf@hit.edu.cn).

#### **This supplement file includes**

Supplementary Tables 1-3

Supplementary Figures 1-15

**Table S1** Actual chemical compositions of  $\text{Mg}_{3.2}\text{Sb}_{1.99-x}\text{Bi}_x\text{Se}_{0.01}$  ( $x = 0.5, 0.75, 1, 1.25, \text{ and } 1.5$ ) and  $\text{Mg}_{3.15}\text{Co}_{0.05}\text{Sb}_{1.24}\text{Bi}_{0.75}\text{Se}_{0.01}$  determined by EDS.

| Nominal composition                                                                | Actual composition                                                                      |
|------------------------------------------------------------------------------------|-----------------------------------------------------------------------------------------|
| $\text{Mg}_{3.2}\text{Sb}_{1.49}\text{Bi}_{0.5}\text{Se}_{0.01}$                   | $\text{Mg}_{3.015}\text{Sb}_{1.490}\text{Bi}_{0.489}\text{Se}_{0.008}$                  |
| $\text{Mg}_{3.2}\text{Sb}_{1.24}\text{Bi}_{0.75}\text{Se}_{0.01}$                  | $\text{Mg}_{3.017}\text{Sb}_{1.240}\text{Bi}_{0.733}\text{Se}_{0.008}$                  |
| $\text{Mg}_{3.2}\text{Sb}_{0.99}\text{Bi}\text{Se}_{0.01}$                         | $\text{Mg}_{3.027}\text{Sb}_{0.990}\text{Bi}_{0.985}\text{Se}_{0.009}$                  |
| $\text{Mg}_{3.2}\text{Sb}_{0.74}\text{Bi}_{1.25}\text{Se}_{0.01}$                  | $\text{Mg}_{3.013}\text{Sb}_{0.740}\text{Bi}_{1.234}\text{Se}_{0.009}$                  |
| $\text{Mg}_{3.2}\text{Sb}_{0.49}\text{Bi}_{1.5}\text{Se}_{0.01}$                   | $\text{Mg}_{3.014}\text{Sb}_{0.490}\text{Bi}_{1.482}\text{Se}_{0.008}$                  |
| $\text{Mg}_{3.15}\text{Co}_{0.05}\text{Sb}_{1.24}\text{Bi}_{0.75}\text{Se}_{0.01}$ | $\text{Mg}_{2.982}\text{Co}_{0.029}\text{Sb}_{1.240}\text{Bi}_{0.732}\text{Se}_{0.007}$ |

**Table S2** Room temperature electrical properties (including electrical conductivity, Seebeck coefficient, Hall carrier concentration, Hall carrier mobility, and band gap) of  $\text{Mg}_{3.2}\text{Sb}_{1.99-x}\text{Bi}_x\text{Se}_{0.01}$  ( $x = 0.5, 0.75, 1, 1.25, \text{ and } 1.5$ ).

| Content    | $\sigma$                    | $S$                      | $ n _{\text{H}}$              | $\mu_{\text{H}}$                                | $E_{\text{g}}^*$ |
|------------|-----------------------------|--------------------------|-------------------------------|-------------------------------------------------|------------------|
|            | ( $10^4 \text{ S m}^{-1}$ ) | ( $\mu\text{V K}^{-1}$ ) | ( $10^{19} \text{ cm}^{-3}$ ) | ( $\text{cm}^2 \text{ V}^{-1} \text{ s}^{-1}$ ) | (eV)             |
| $x = 0.5$  | 2.79                        | -235.2                   | 2.0                           | 83.6                                            | 0.43             |
| $x = 0.75$ | 3.31                        | -230.9                   | 2.2                           | 100.8                                           | 0.39             |
| $x = 1$    | 4.41                        | -207.0                   | 2.4                           | 116.8                                           | 0.36             |
| $x = 1.25$ | 6.04                        | -196.8                   | 2.6                           | 143.5                                           | 0.29             |
| $x = 1.5$  | 6.58                        | -190.4                   | 2.7                           | 155.7                                           | 0.23             |

\*The band gap was estimated by Goldsmid-Sharp formula:  $E_{\text{g}} = 2e|S_{\text{max}}|T_{\text{max}}$ .<sup>1</sup>

**Table S3** Finite element simulation setting parameters.

| <b>Parameter</b>                     | <b>Value</b>                                      |
|--------------------------------------|---------------------------------------------------|
| Total cross-sectional area $A_{pn}$  | $2 \times 3.6 \times 3.6 \text{ mm}^2$            |
| Cold-side thermal contact resistance | $1.2 \times 10^4 \text{ W m}^{-2} \text{ K}^{-1}$ |
| Hot-side thermal contact resistance  | $2 \times 10^3 \text{ W m}^{-2} \text{ K}^{-1}$   |
| Electrical contact resistivity       | $20 \text{ } \mu\Omega \cdot \text{cm}^2$         |
| Cold-side temperature                | 293 K                                             |
| Hot-side temperature                 | 773 K                                             |

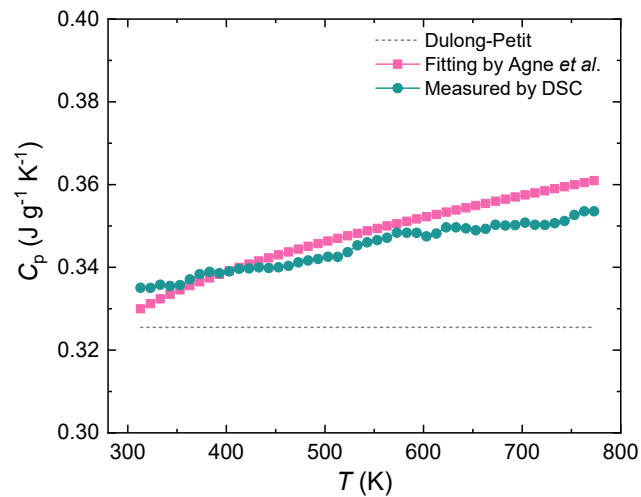

**Fig. S1** Temperature-dependent heat capacity ( $C_p$ ) of  $\text{Mg}_{3.15}\text{Co}_{0.05}\text{Sb}_{1.24}\text{Bi}_{0.75}\text{Se}_{0.01}$ . The fitting curve is obtained using the equation proposed by Agne *et al.*,<sup>2</sup> in comparison to the Dulong-Petit law and DSC measurement.

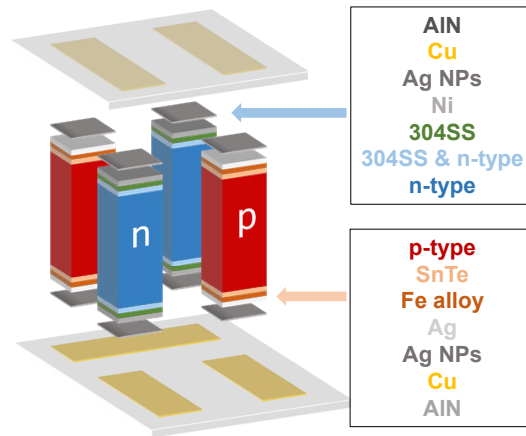

**Fig. S2** Schematic of module structure design. The n-type part includes thermoelectric legs, transition layers (304SS mixed with n-type TE materials, with a mass ratio of 1:1), barrier layers (304SS), metalization layer (Ni), solder layers (Ag NPs), electrode layers (Cu), and pre-circuited AlN ceramic plates. The p-type part includes thermoelectric legs, transition layers (SnTe), barrier layers (Fe alloy), metalization layer (Ag), solder layers (Ag NPs), electrode layers (Cu), and pre-circuited AlN ceramic plates.

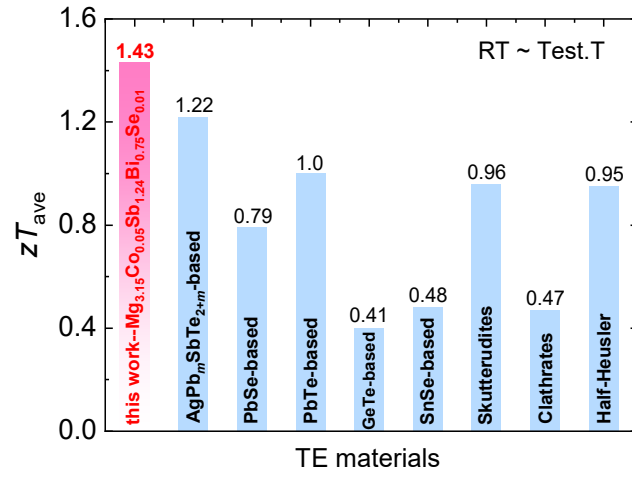

**Fig. S3** Comparison of the average  $zT$  from room temperature to test temperature between the optimized sample ( $Mg_{3.15}Co_{0.05}Sb_{1.24}Bi_{0.75}Se_{0.01}$ ) in this work and other typical advanced n-type TE materials.

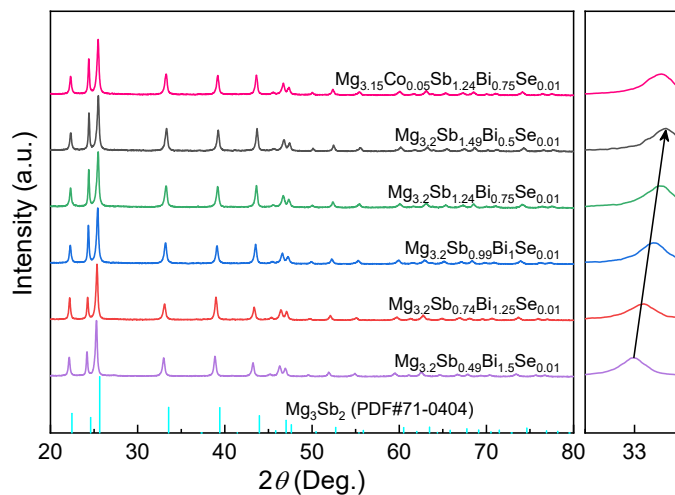

**Fig. S4** XRD patterns of  $\text{Mg}_{3.2}\text{Sb}_{1.99-x}\text{Bi}_x\text{Se}_{0.01}$  ( $x = 0.5, 0.75, 1, 1.25, \text{ and } 1.5$ ) and  $\text{Mg}_{3.15}\text{Co}_{0.05}\text{Sb}_{1.24}\text{Bi}_{0.75}\text{Se}_{0.01}$ . All the diffraction peaks can be indexed by the trigonal  $\alpha\text{-Mg}_3\text{Sb}_2$  phase (PDF#71-0404) with a  $P\bar{3}m1$  space group, and the peak positions shift to a larger angle with the decrease of Bi content.



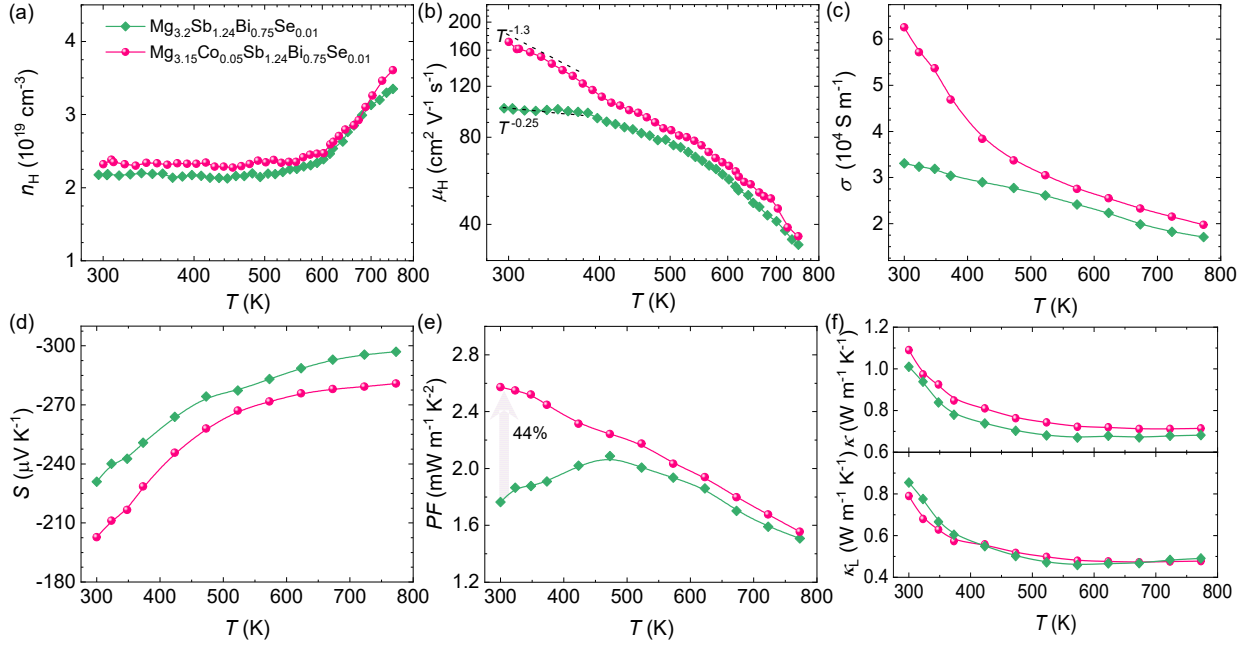

**Fig. S5** Temperature-dependent (a) Hall carrier concentration, (b) Hall carrier mobility, (c) electrical conductivity, (d) Seebeck coefficient, (e) power factor, (f) total thermal conductivity and lattice thermal conductivity of  $\text{Mg}_{3.2}\text{Sb}_{1.24}\text{Bi}_{0.75}\text{Se}_{0.01}$  and  $\text{Mg}_{3.15}\text{Co}_{0.05}\text{Sb}_{1.24}\text{Bi}_{0.75}\text{Se}_{0.01}$ .

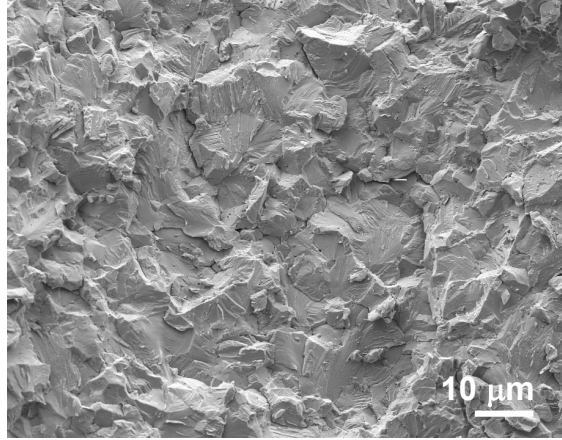

**Fig. S6** The SEM images of the fracture morphology of the  $\text{Mg}_{3.15}\text{Co}_{0.05}\text{Sb}_{1.24}\text{Bi}_{0.75}\text{Se}_{0.01}$  sample.

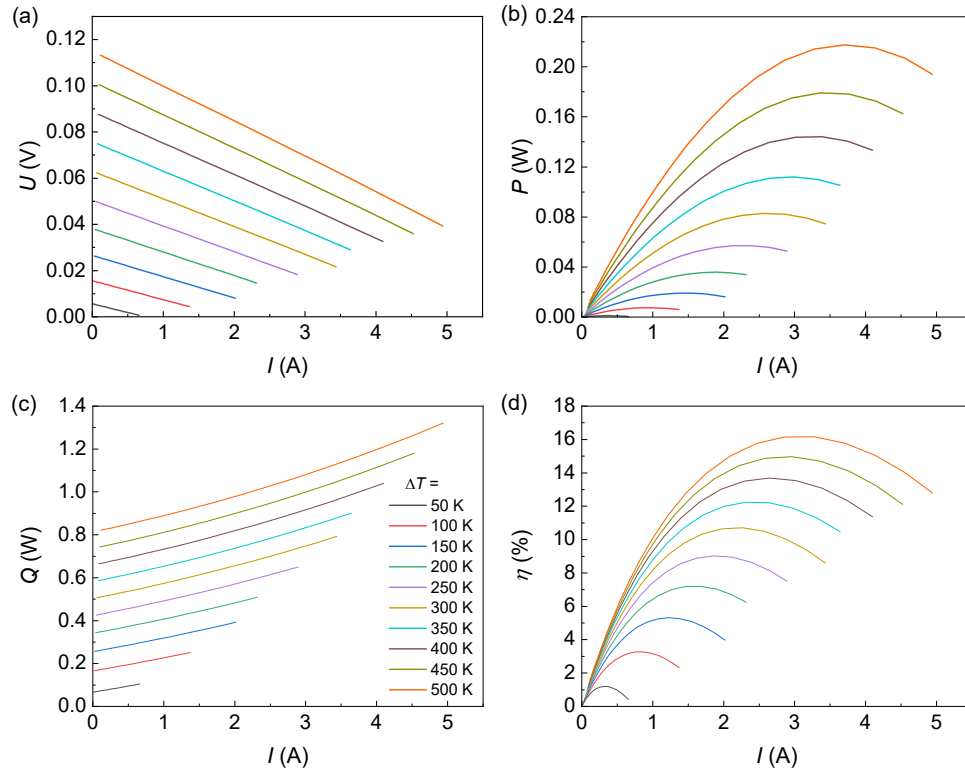

**Fig. S7** Simulated properties of the n-type single-leg device ( $\text{Mg}_{3.15}\text{Co}_{0.05}\text{Sb}_{1.24}\text{Bi}_{0.75}\text{Se}_{0.01}$ ). Current-dependent (a) output voltage, (b) output power, (c) heat flow, and (d) efficiency for the single-leg device at different temperature differences.

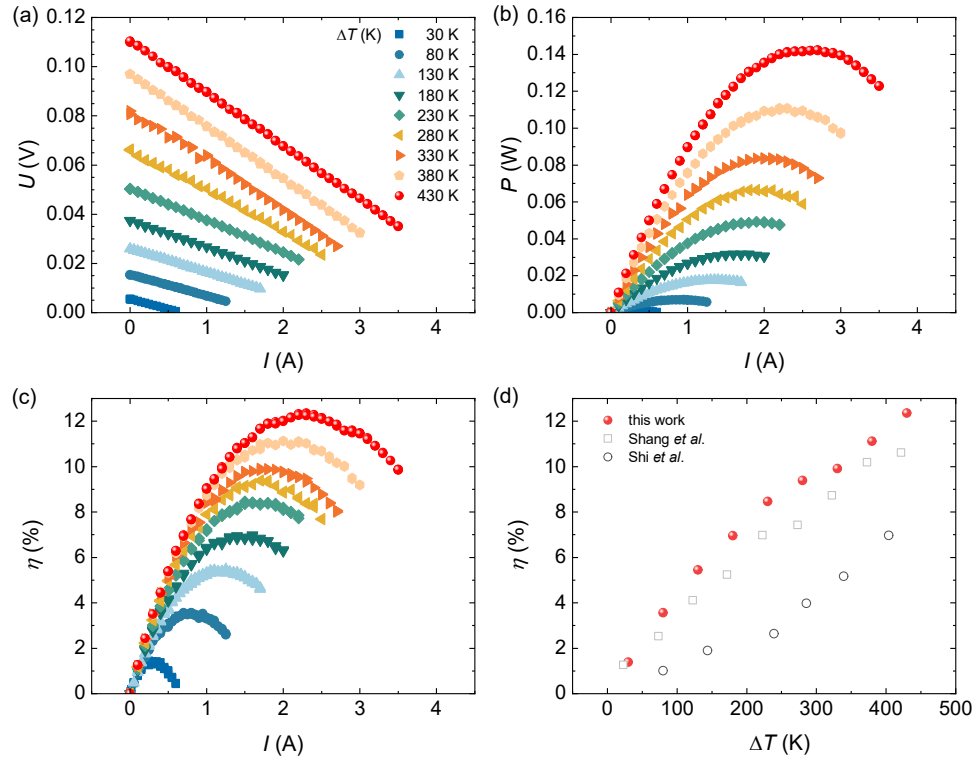

**Fig. S8** Measured properties of n-type single-leg device ( $\text{Mg}_{3.15}\text{Co}_{0.05}\text{Sb}_{1.24}\text{Bi}_{0.75}\text{Se}_{0.01}$ ). Current-dependent (a) output voltage, (b) output power, and (c) efficiency for the single-leg device at different temperature difference. (d) Comparison of the maximum efficiency in this work and literature results at different temperature difference.

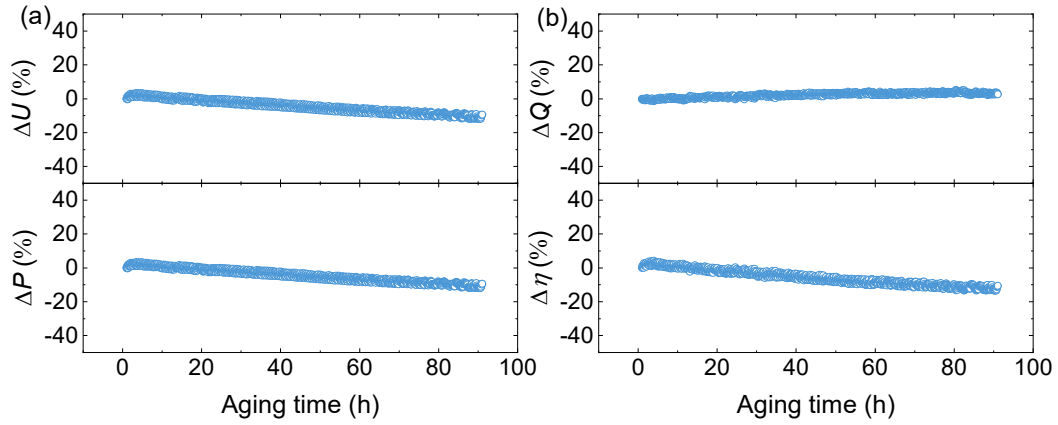

**Fig. S9** Thermal aging test results (90-hour aging at  $T_h = 723$  K and a  $\Delta T$  of 430 K.) for n-type single-leg device ( $\text{Mg}_{3.15}\text{Co}_{0.05}\text{Sb}_{1.24}\text{Bi}_{0.75}\text{Se}_{0.01}$ ). Showing changes in (a) output voltage and output power, (b) heat flow at maximum efficiency and maximum efficiency as a function of thermal cycle number.

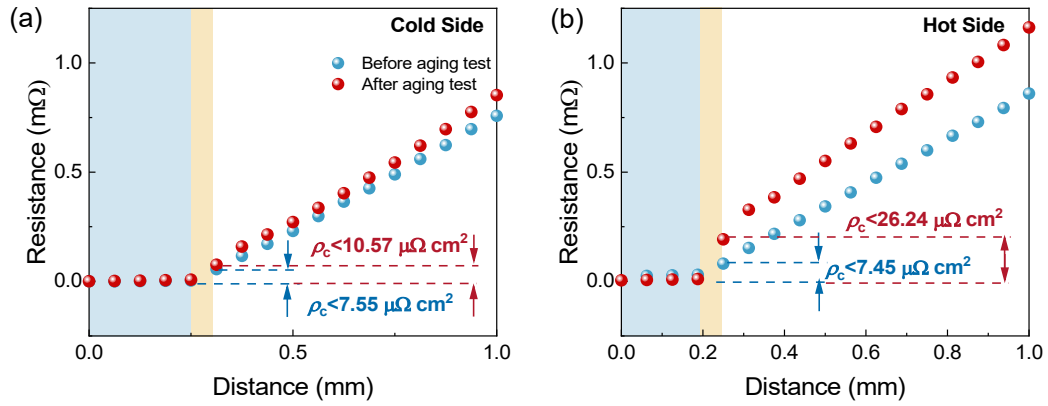

**Fig. S10** Resistance scanning results for n-type (left-304SS/right-  $\text{Mg}_{3.15}\text{Co}_{0.05}\text{Sb}_{1.24}\text{Bi}_{0.75}\text{Se}_{0.01}$ ) junctions, before and after aging test (90-hour aging at  $T_h = 723 \text{ K}$  and a  $\Delta T$  of 430 K.). (a) at cold side; (b) at hot side.

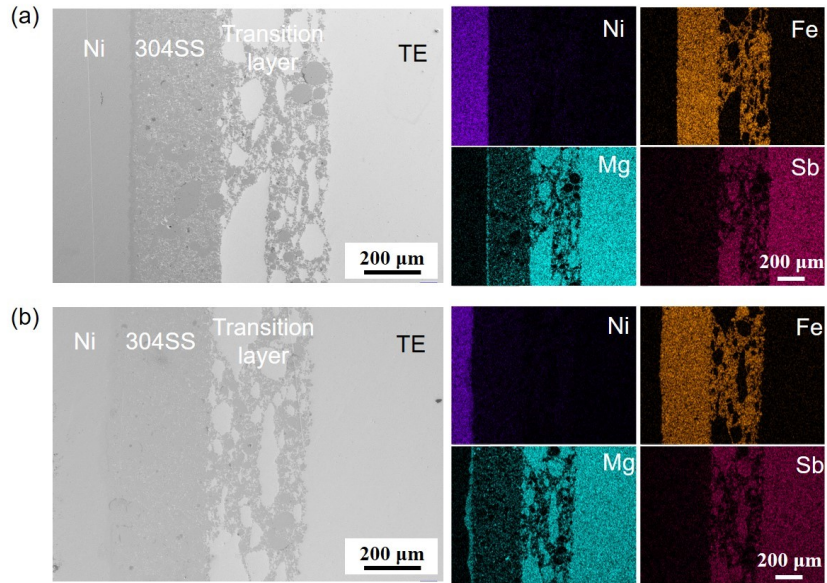

**Fig. S11** SEM images and EDS mapping results of the hot side 304SS/ $\text{Mg}_{3.15}\text{Co}_{0.05}\text{Sb}_{1.24}\text{Bi}_{0.75}\text{Se}_{0.01}$  junctions (a) as-prepared, and (b) aging at  $T_h = 723$  K and a  $\Delta T$  of 430 K for 90 hours. The transition layer is a mixture of n-type TE materials with 304SS, with a mass ratio of 1:1.

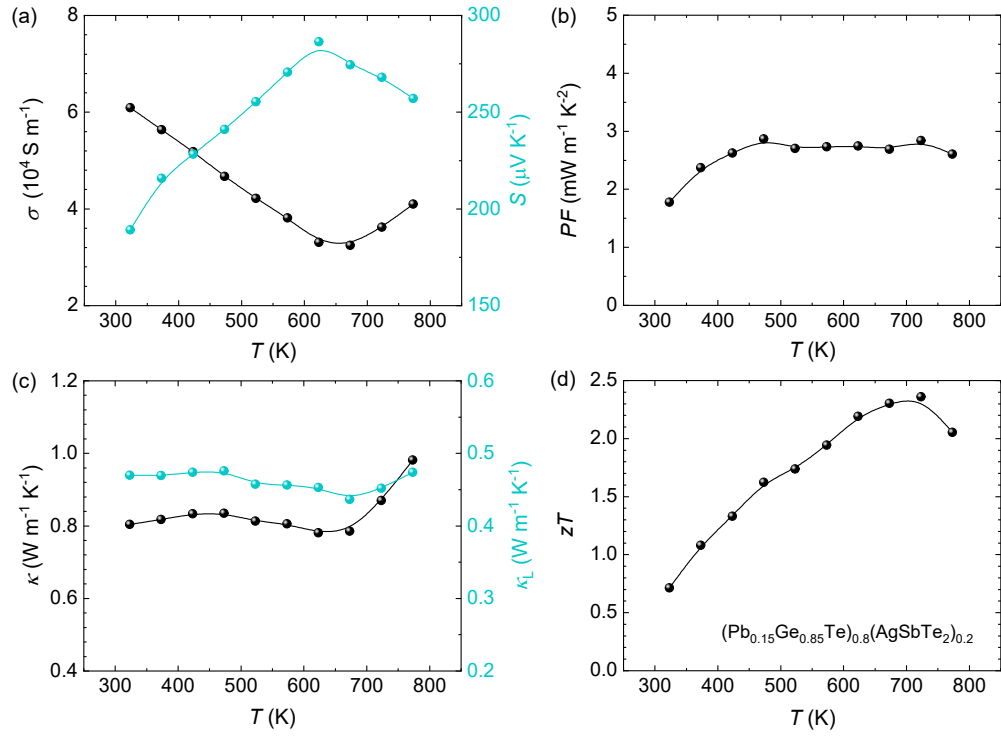

**Fig. S12** Temperature-dependent (a) electrical conductivity and Seebeck coefficient, (b) power factor, (c) total thermal conductivity and lattice thermal conductivity, and (d)  $zT$  values of  $(\text{Pb}_{0.15}\text{Ge}_{0.85}\text{Te})_{0.8}(\text{AgSbTe}_2)_{0.2}$ .



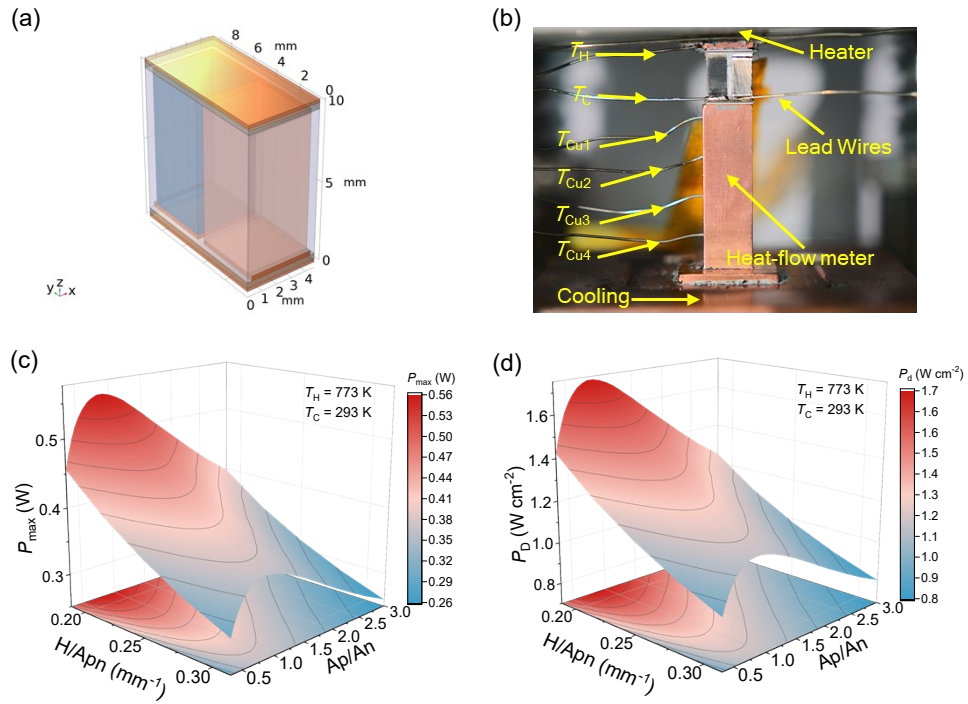

**Fig. S13** 3D plots of (a) unit couple, (c) the maximum output power ( $P$ ), and (d) the maximum power density ( $P_D$ ) based on calculation results for the boundary conditions specified by  $T_h = 773$  K and  $T_c = 293$  K. (b) Schematic diagram of the energy conversion efficiency measurement system.

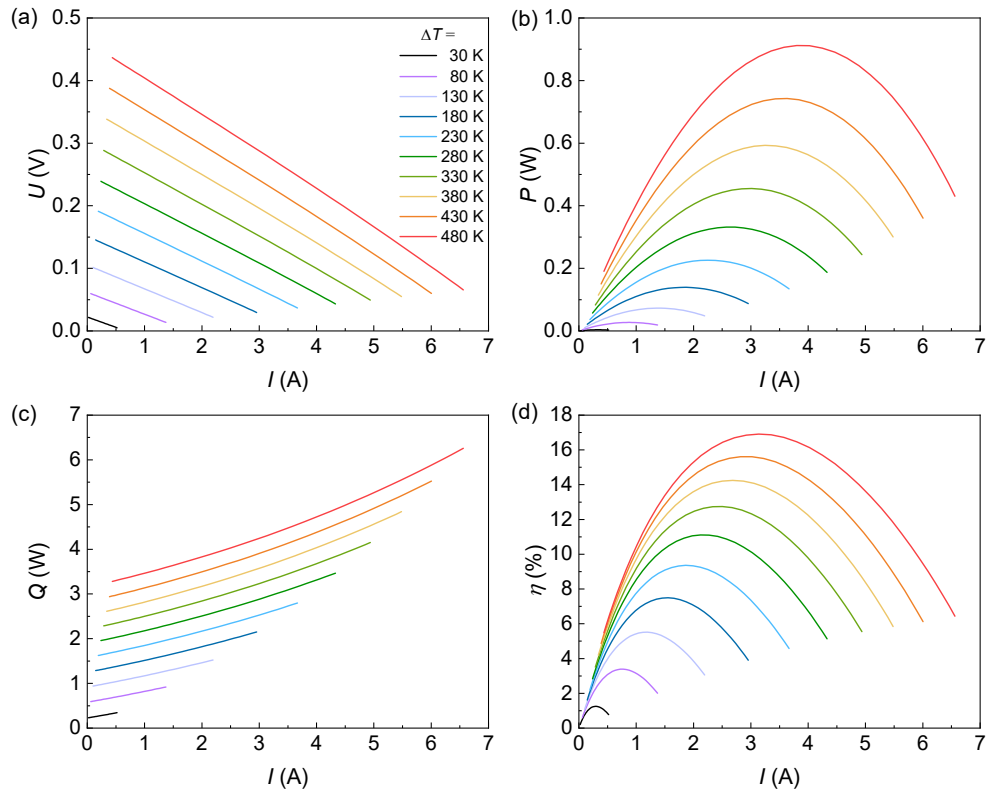

**Fig. S14** Simulated properties of the  $(\text{Mg}_{3.15}\text{Co}_{0.05}\text{Sb}_{1.24}\text{Bi}_{0.75}\text{Se}_{0.01}/(\text{Pb}_{0.15}\text{Ge}_{0.85}\text{Te})_{0.8}(\text{AgSbTe}_2)_{0.2})$  module. Current-dependent (a) output voltage, (b) output power, (c) heat flow, and (d) efficiency for the module at different temperature differences.

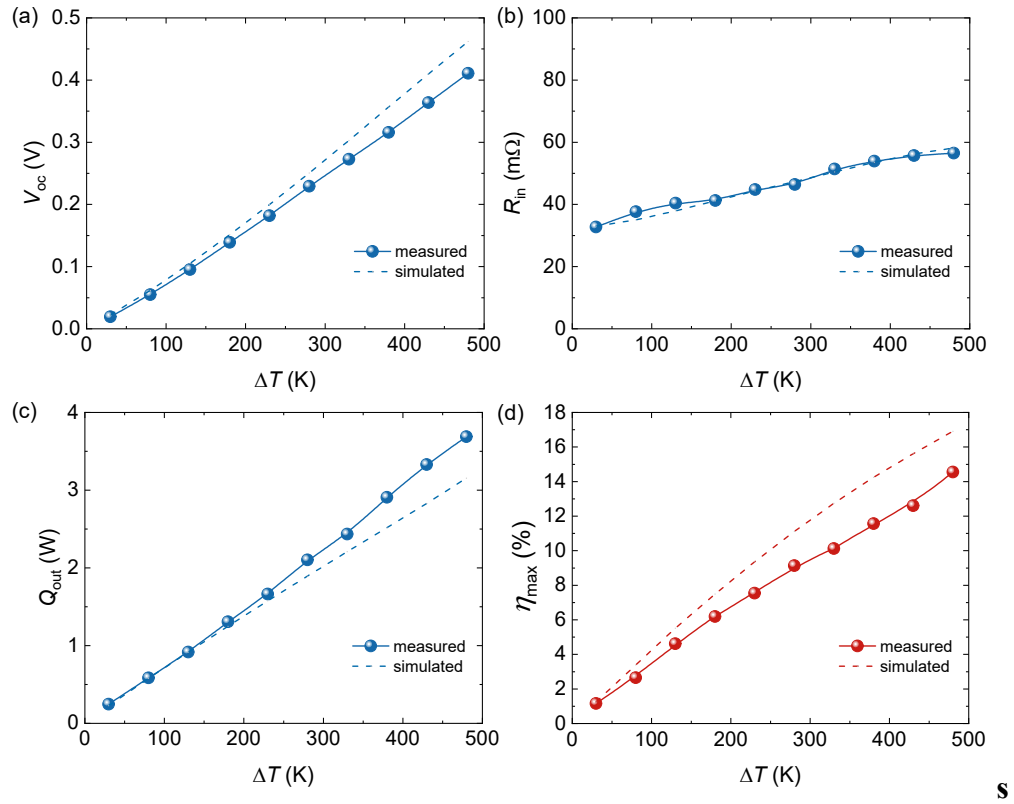

**Fig. S15** Experimental and simulated current-dependent (a) open-circuit voltage ( $V_{oc}$ ), (b) internal resistance ( $R_{in}$ ) (c) maximum output heat flow, and (d) conversion efficiency at different temperature differences.

## Reference

1. Z. M. Gibbs, H.-S. Kim, H. Wang and G. J. Snyder, *Appl. Phys. Lett.*, 2015, **106**, 022112.
2. M. T. Agne, K. Imasato, S. Anand, K. Lee, S. K. Bux, A. Zevalkink, A. J. E. Rettie, D. Y. Chung, M. G. Kanatzidis and G. J. Snyder, *Mater. Today Phys.*, 2018, **6**, 83-88.
